# Supplementary material for: Loss of TET2 and TET3 in regulatory T cells unleashes effector function
Source: PubMed Central journal article supplement (PMC6494907; doi:10.1038/s41467-019-09541-y), 2019-05-01
Supplement: 41467_2019_9541_MOESM1_ESM.pdf [file 41467_2019_9541_MOESM1_ESM.pdf]

## Supplementary Information

### **Loss of TET2 and TET3 in regulatory T cells unleashes effector function**

Yue et al.

**This file includes:**

Supplementary Figure1 to Figure13

Supplementary Table1 and Table2

## Supplementary Figure 1

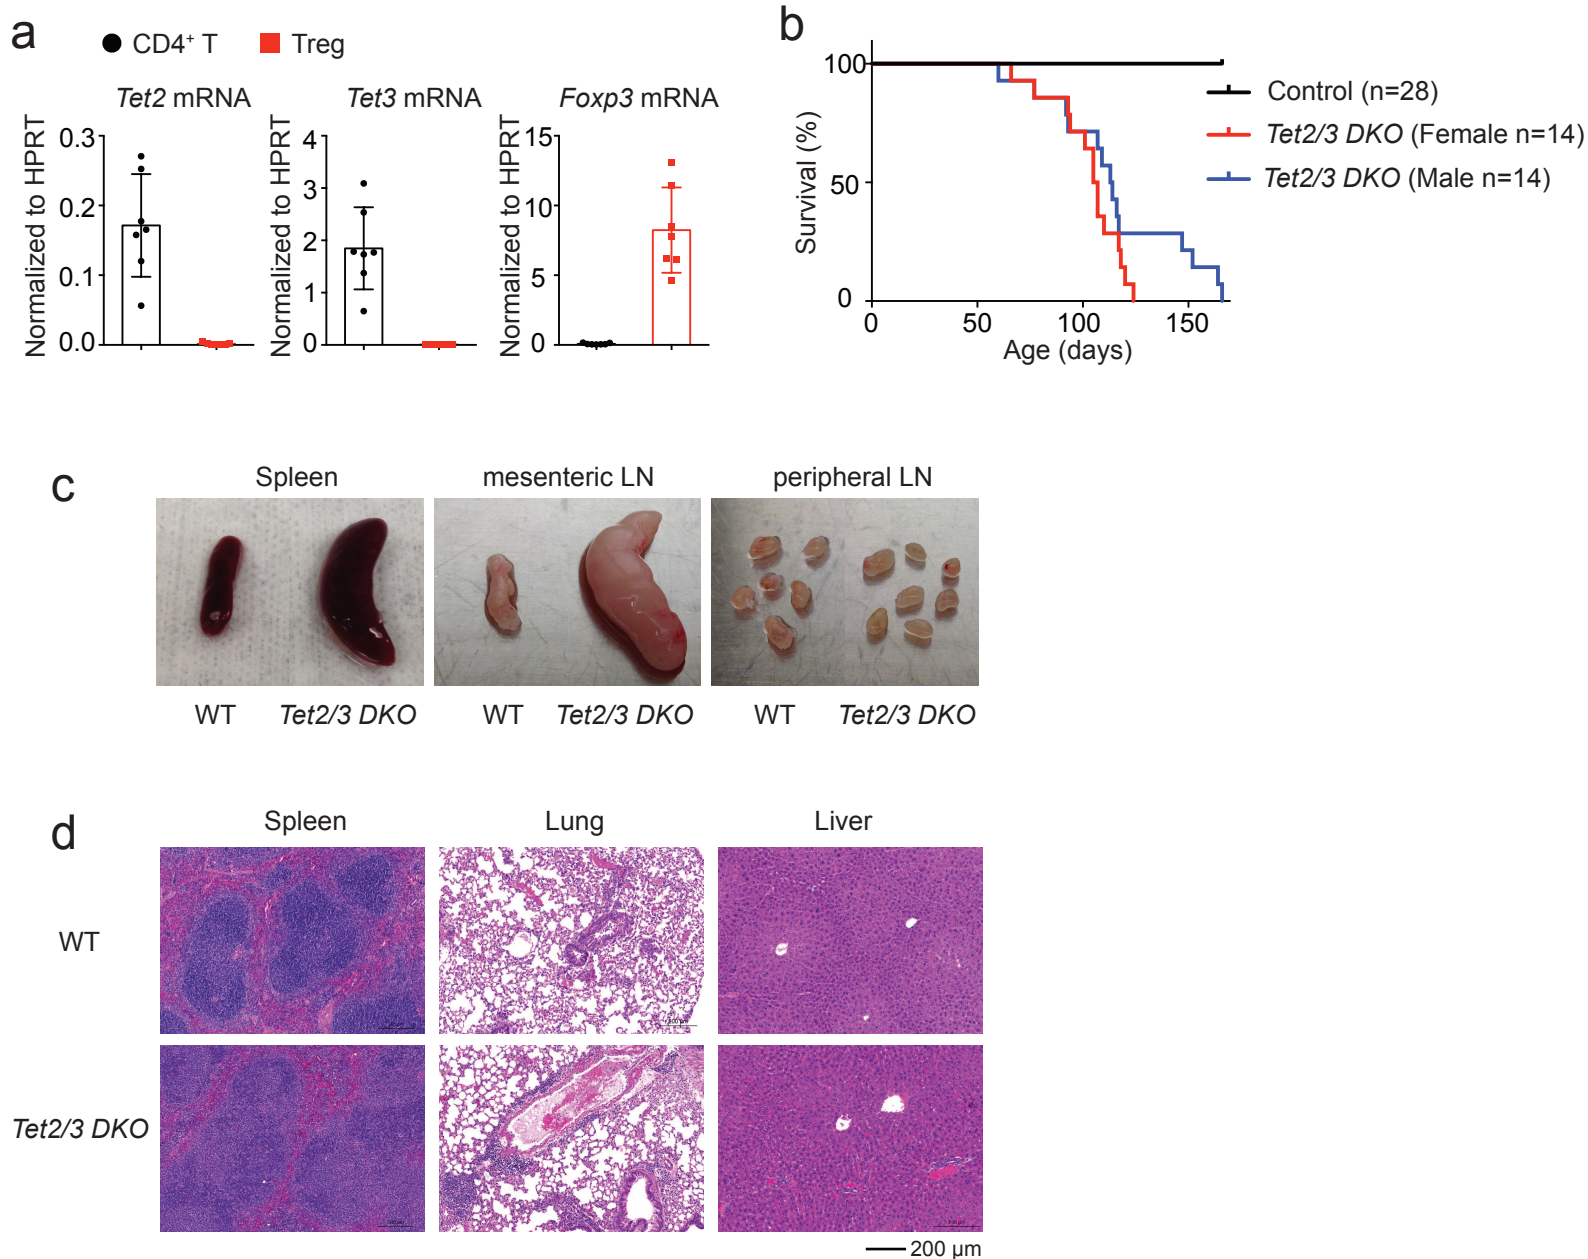

### Supplementary Figure 1. Characterization of mice with Treg-specific deficiency of *Tet2* and *Tet3*.

**a.** Quantitative real-time PCR analysis of *Tet2*, *Tet3* and *Foxp3* expression level in CD4<sup>+</sup>Foxp3<sup>-</sup> T cells (CD4<sup>+</sup> T) and CD4<sup>+</sup>Foxp3<sup>+</sup> Treg cells (Treg) isolated from *Tet2/3<sup>fl/fl</sup>Foxp3<sup>Cre</sup>* DKO mice (13-16 weeks old). **b.** Survival curves for control WT (n=28) and *Tet2/3<sup>fl/fl</sup>Foxp3<sup>Cre</sup>* DKO mice separated into female and male groups (n=14 for each group). **c.** Representative pictures of spleen, mesenteric lymph nodes and peripheral lymph nodes (pLN) from WT and *Tet2/3<sup>fl/fl</sup>Foxp3<sup>Cre</sup>* DKO mice (14 weeks old). **d.** H&E staining of spleen, lung and liver of WT and *Tet2/3<sup>fl/fl</sup>Foxp3<sup>Cre</sup>* DKO mice (15-16 weeks old). Error bars show mean ± s.d. from at least three independent experiments.

## Supplementary Figure 2

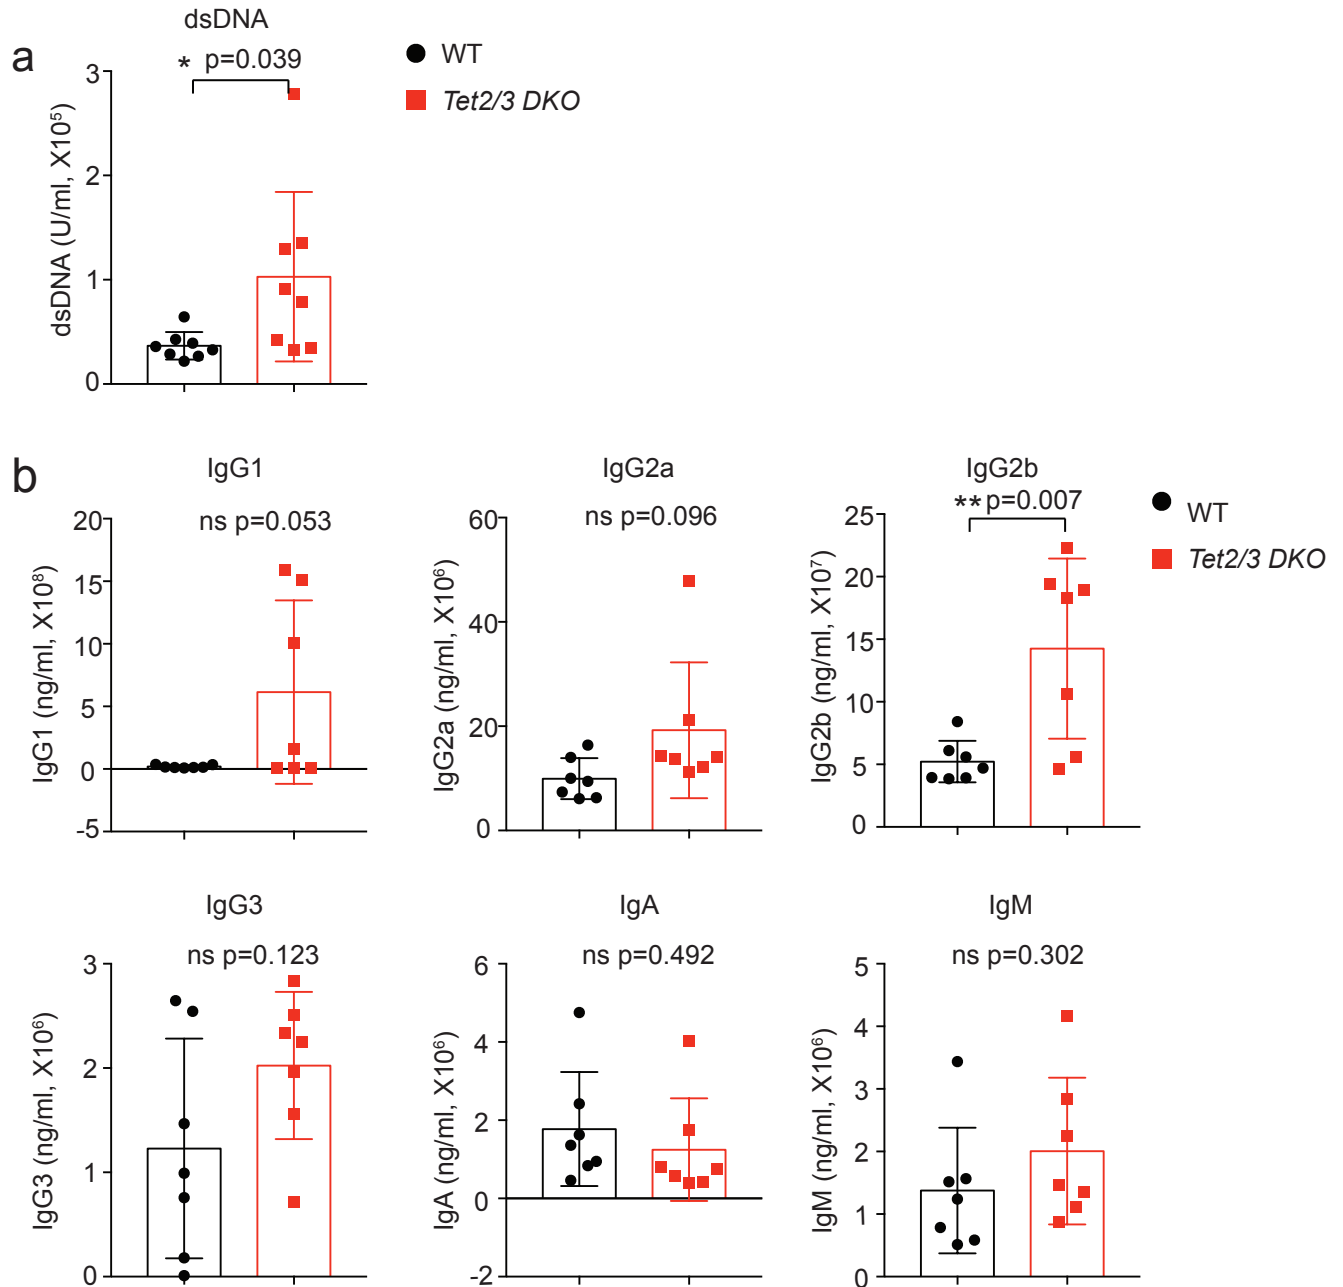

**Supplementary Figure 2. Analysis of anti-dsDNA antibody and immunoglobulin levels in the serum isolated from *Tet2/3<sup>fl/fl</sup>Foxp3<sup>Cre</sup>* DKO mice.**

**a.** Quantification of anti-dsDNA antibody in the serum of WT and *Tet2/3<sup>fl/fl</sup>Foxp3<sup>Cre</sup>* DKO mice (11-16 weeks old, WT n=8, *Tet2/3<sup>fl/fl</sup>Foxp3<sup>Cre</sup>* DKO mice n=7). **b.** Quantification of immunoglobulin IgG1, IgG2a, IgG2b, IgG3, IgA and IgM in the serum of WT and *Tet2/3<sup>fl/fl</sup>Foxp3<sup>Cre</sup>* DKO mice (11-16 weeks old, WT n=7, *Tet2/3<sup>fl/fl</sup>Foxp3<sup>Cre</sup>* DKO mice n=7). Error bars show mean  $\pm$  s.d. from two independent experiments. Statistical analysis was performed using two-tailed unpaired student's t test (\*P<0.05, \*\*P<0.01).

## Supplementary Figure 3

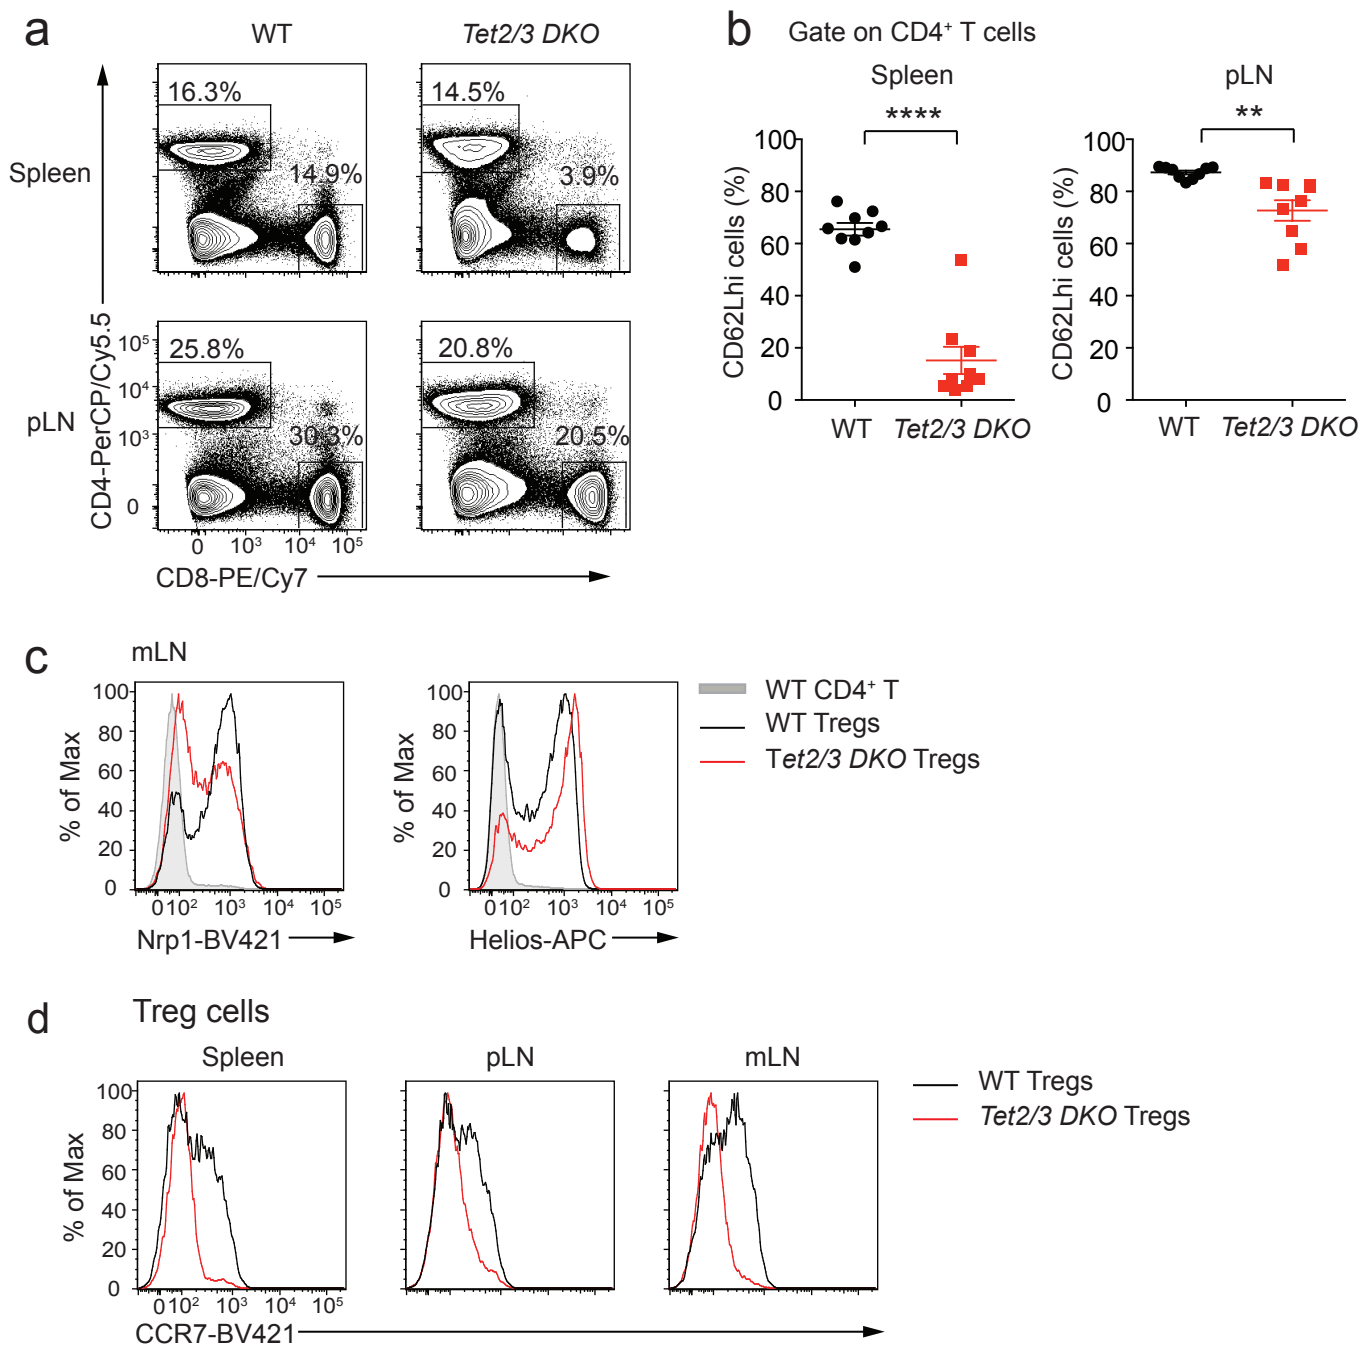

### Supplementary Figure 3. Characterization of CD4<sup>+</sup> and CD8<sup>+</sup> T cell compartments and Treg cells in *Tet2/3<sup>fl/fl</sup>Foxp3<sup>Cre</sup>* DKO mice.

**a.** Representative flow cytometry analysis of CD4 and CD8 expression in spleen (*upper panels*) and pLN (*lower panels*) from WT and *Tet2/3<sup>fl/fl</sup>Foxp3<sup>Cre</sup>* DKO mice (13-16 weeks old). **b.** Quantification of the percentage of CD62L<sup>high</sup> cells in CD4<sup>+</sup> T cells in spleen and pLNs from WT and *Tet2/3<sup>fl/fl</sup>Foxp3<sup>Cre</sup>* DKO mice (13-16 weeks old, see flow cytometry plots of Figure 1d). Statistical analysis was performed using two-tailed unpaired student's t test (\*\*P<0.01, \*\*\*P<0.001). Error bars show mean  $\pm$  s.d. from at least three independent experiments. **c.** Flow cytometry analysis of *Tet2/3*-deficient Treg cells (13-16 weeks old) from mLN for the expression of Nrp1 and Helios. Shown are WT CD4<sup>+</sup> T cells (shaded grey); WT Tregs (black line); DKO Tregs (red line). **d.** Flow cytometry analysis of *Tet2/3*-deficient Treg cells (13-16 weeks old) from spleen (*left*), pLN (*middle*) and mLN (*right*) for the expression of CCR7. Shown are WT Tregs (black line); DKO Tregs (red line).

# Supplementary Figure 4

## a Spleen

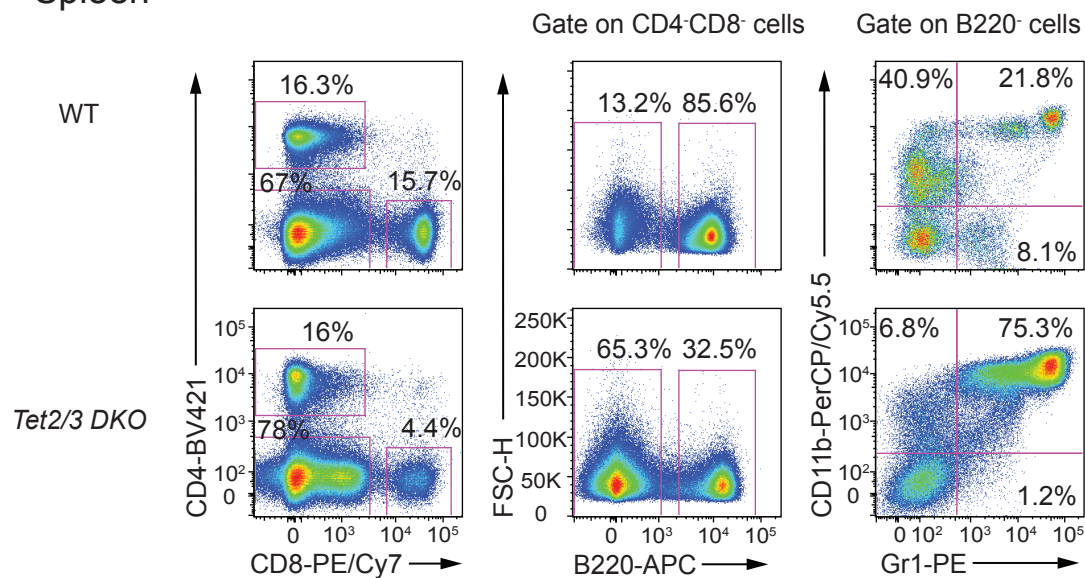

## b pLN

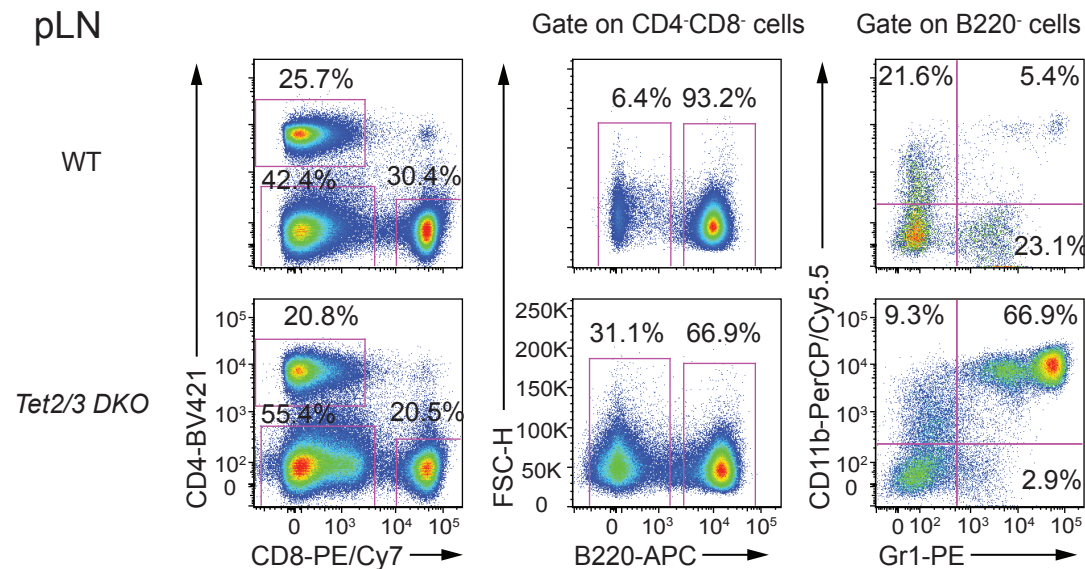

## c

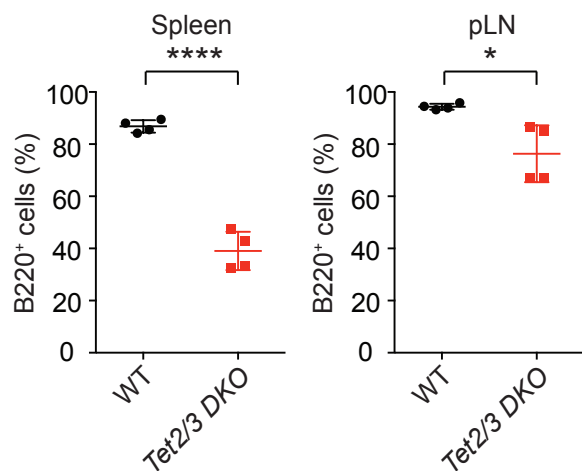

## d

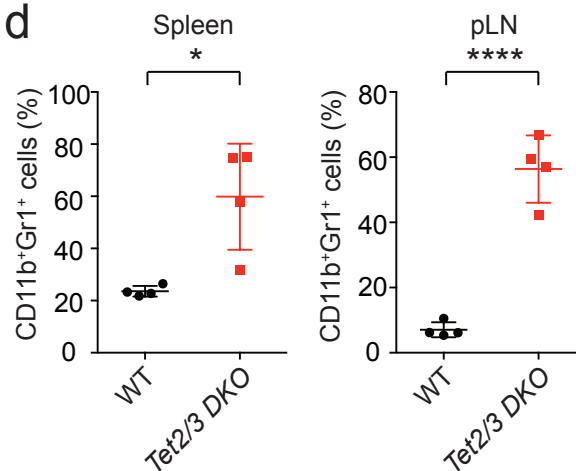

**Supplementary Figure 4. Analysis of B cell and Myeloid cell lineages in *Tet2/3<sup>fl/fl</sup>Foxp3<sup>Cre</sup>* DKO mice.**

**a-b.** Flow cytometry staining of cells from spleen (**a**) and peripheral lymph nodes (pLN) (**b**) isolated from WT (*upper panels*) and *Tet2/3<sup>fl/fl</sup>Foxp3<sup>Cre</sup>* DKO mice (*lower panels*) for the cell surface markers of CD4 and CD8 (*left panels*), B220 (*middle panels*, gated on CD4<sup>-</sup>CD8<sup>-</sup> cells), CD11b and Gr1 (*right panels*, gated on CD4<sup>-</sup>CD8<sup>-</sup>B220<sup>-</sup> cells). **c-d.** Quantification of the percentage of B220<sup>+</sup> cells (**c**) and CD11b<sup>+</sup>Gr1<sup>+</sup> cells (**d**) in spleen (*left panels*) and pLN (*right panels*) isolated from WT and *Tet2/3<sup>fl/fl</sup>Foxp3<sup>Cre</sup>* DKO mice. Data are representative of four independent experiments. Statistical analysis was performed using two-tailed unpaired student's t test (\*P<0.05, \*\*\*\*P<0.0001). Error bars show mean ± s.d. from three independent experiments.

# Supplementary Figure 5

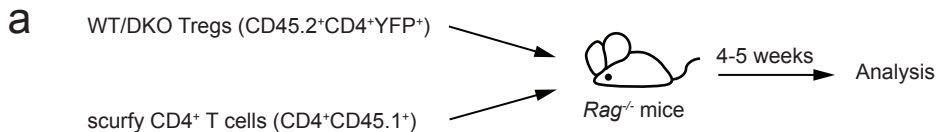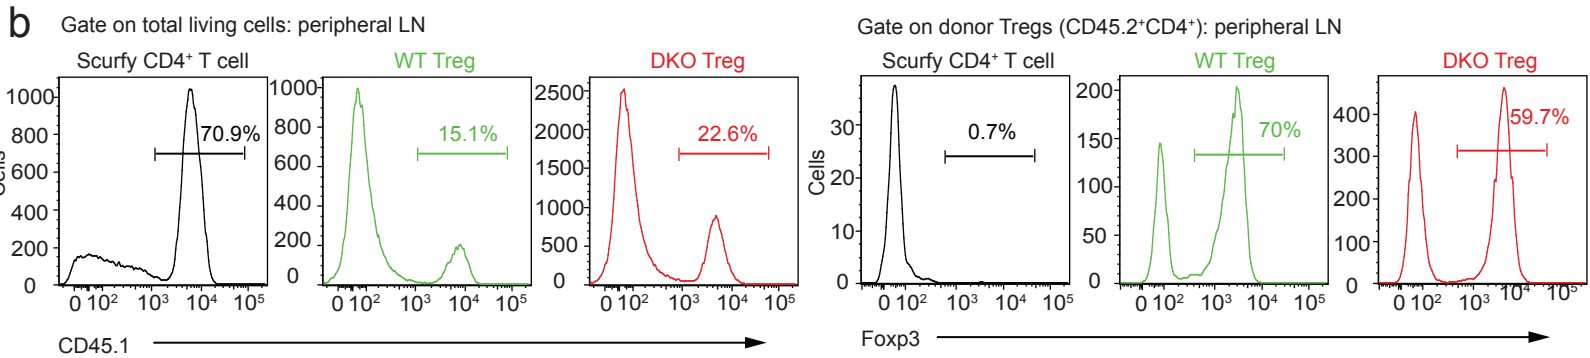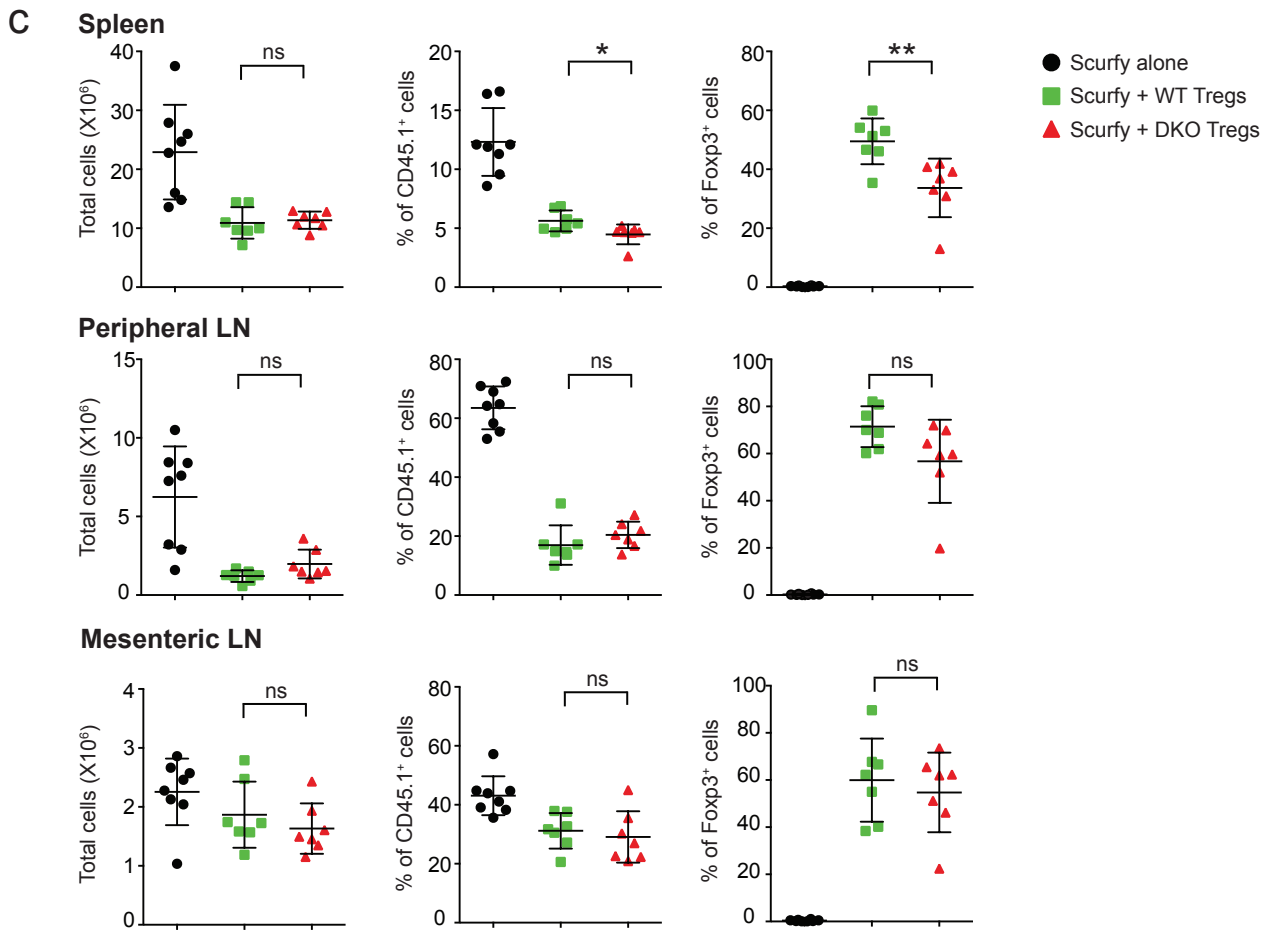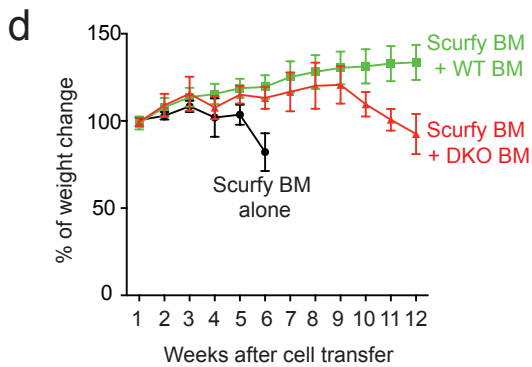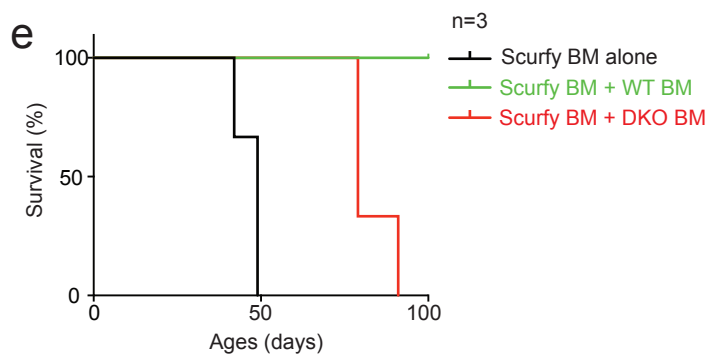

**Supplementary Figure 5. *Tet2/3* DKO Treg cells can correct the *scurfy* phenotype in short term but not long-term assays.**

**a.** Schematic representation of the adoptive transfer experiment to assess the stability and suppressive function of Treg cells from 11-14 week-old *Tet2/3* DKO mice *in vivo*. **b.** Representative histograms of CD45.1<sup>+</sup> cells (*left panel*) and CD45.2<sup>+</sup>CD4<sup>+</sup>Foxp3<sup>+</sup> cells (*right panel*) in peripheral lymph nodes from *Rag*-deficient mice 4-5 weeks after adoptive transfer of *scurfy* CD4<sup>+</sup> T cells alone or together with WT or DKO Treg cells. **c.** Graphs quantifying the total cellularity, percentage of CD45.1<sup>+</sup> cells and percentage of Foxp3<sup>+</sup> cells in transferred Treg cells from *Rag*-deficient mice, 4-5 weeks after adoptive transfer of *scurfy* CD4<sup>+</sup> T cells alone or together with WT or DKO Treg cells. WT and DKO Tregs show an equivalent ability to suppress the uncontrolled expansion of *scurfy* T cells. **d-e.** The percent weight change (**d**) and survival curves (**e**) after adoptive transfer of *scurfy* bone marrow cells, alone or together with WT or DKO bone marrow cells, into sub-lethally irradiated *Rag*-deficient mice (n=3). Statistical analysis was performed using two-tailed unpaired student's t test (\*P<0.05, \*\*P<0.01). Error bars show mean ± s.d.



# Supplementary Figure 6

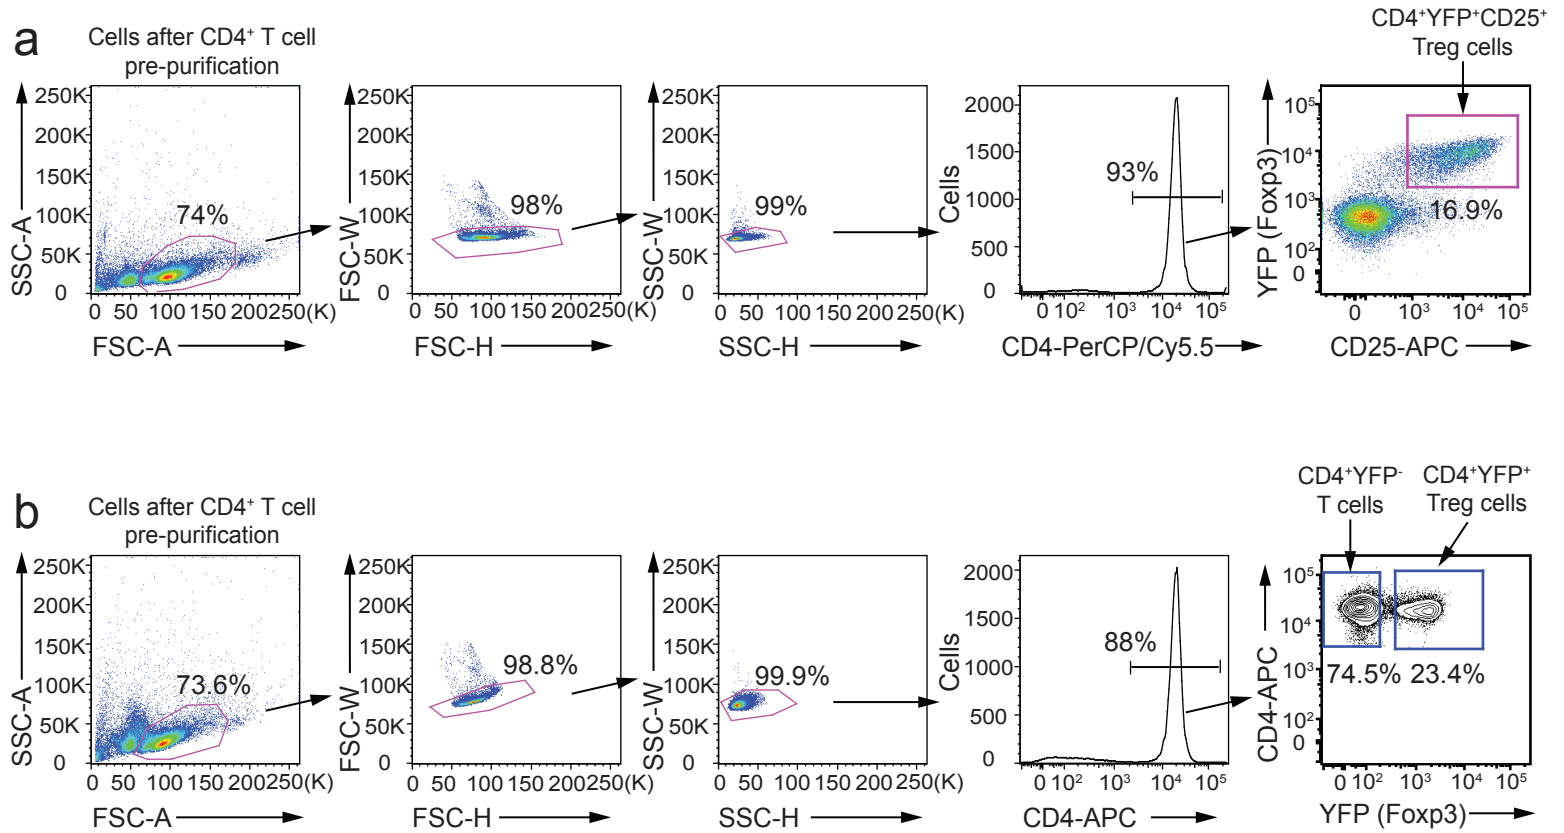

## Supplementary Figure 6. Gating strategies used for cell sorting.

**a.** Gating strategy to sort CD4<sup>+</sup>CD25<sup>+</sup>YFP<sup>+</sup> Treg cells from WT and *Tet2/3<sup>fl/fl</sup>Foxp3<sup>Cre</sup>* DKO mice (8-10 weeks old) for DNA methylation analysis in Figure 3. **b.** Gating strategy to sort CD4<sup>+</sup>YFP<sup>+</sup> Treg cells and CD4<sup>+</sup>YFP<sup>-</sup> T cells from WT and *Tet2/3<sup>fl/fl</sup>Foxp3<sup>Cre</sup>* DKO mice (14 weeks old) for RNA-seq analysis in Figure 4 and in Supplementary Figure 8.

## Supplementary Figure 7

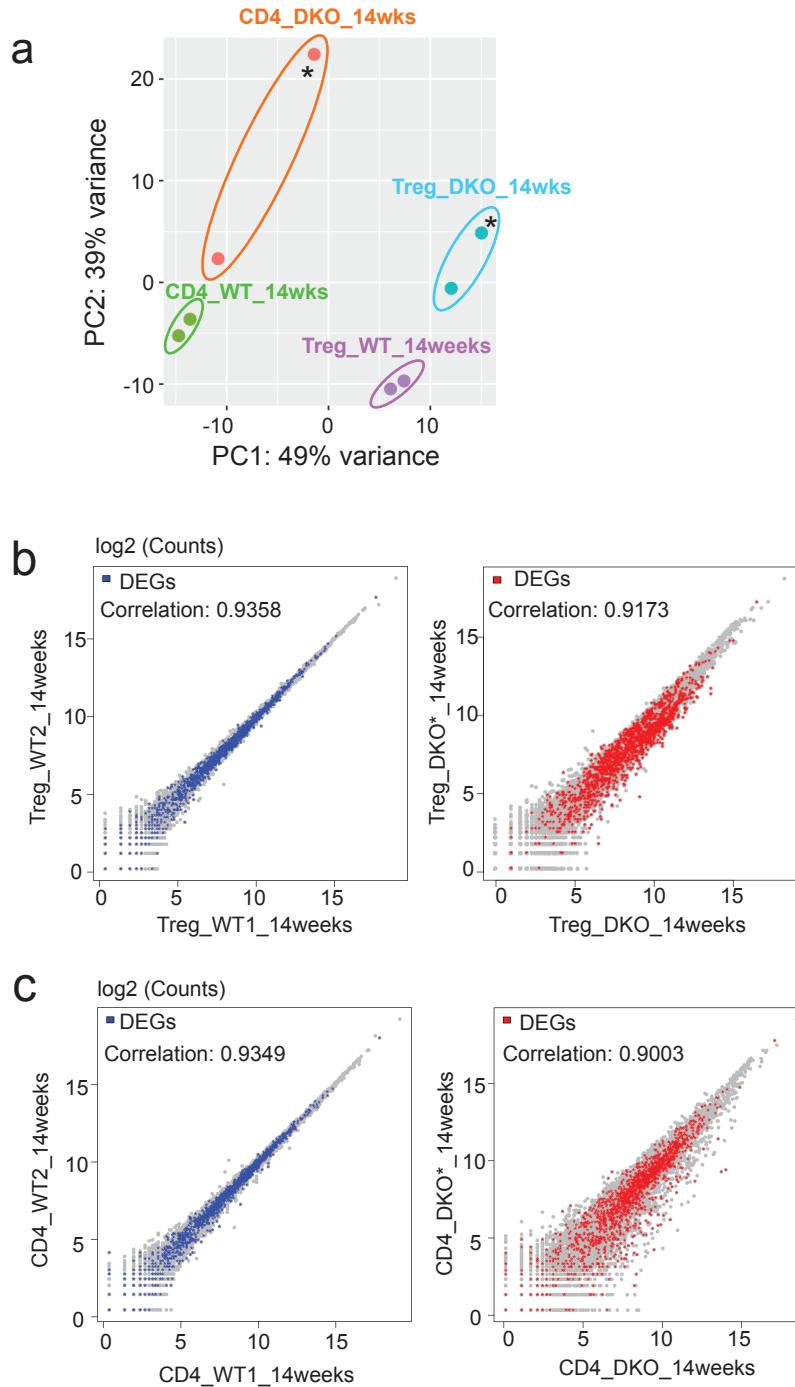

### Supplementary Figure 7. PCA and correlation analysis for RNA-seq samples isolated from pooled spleen and pLNs of WT or *Tet2/3<sup>fl/fl</sup>Foxp3<sup>Cre</sup>* DKO mice.

**a.** Principal component analysis (PCA) plot for replicate RNA-seq samples: comparison of WT and DKO Tregs and WT and DKO CD4<sup>+</sup>Foxp3<sup>+</sup> T cells from 14-weeks old mice. **b-c.** Scatter plots showing the correlation between replicates for Treg cells (**b**) and CD4<sup>+</sup>Foxp3<sup>+</sup> T cells (**c**) from 14-weeks old WT and *Tet2/3<sup>fl/fl</sup>Foxp3<sup>Cre</sup>* DKO mice.

# Supplementary Figure 8

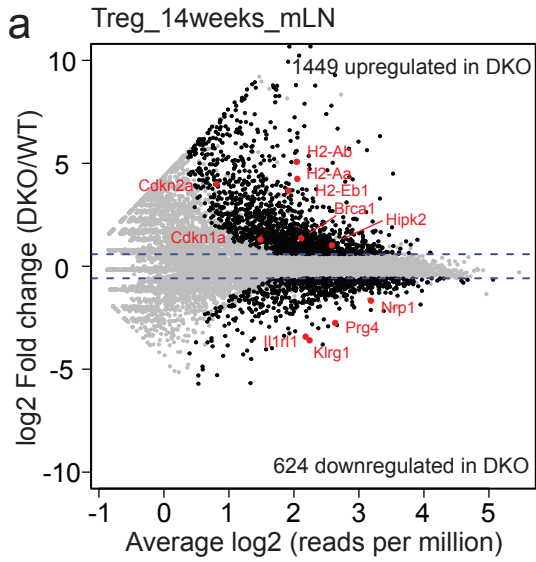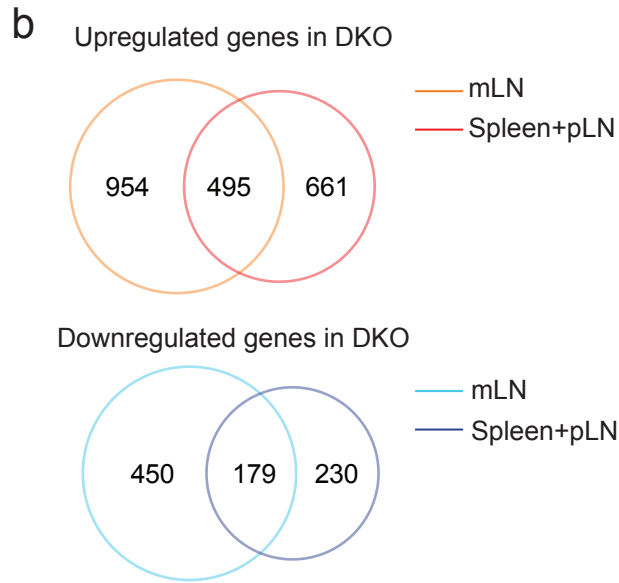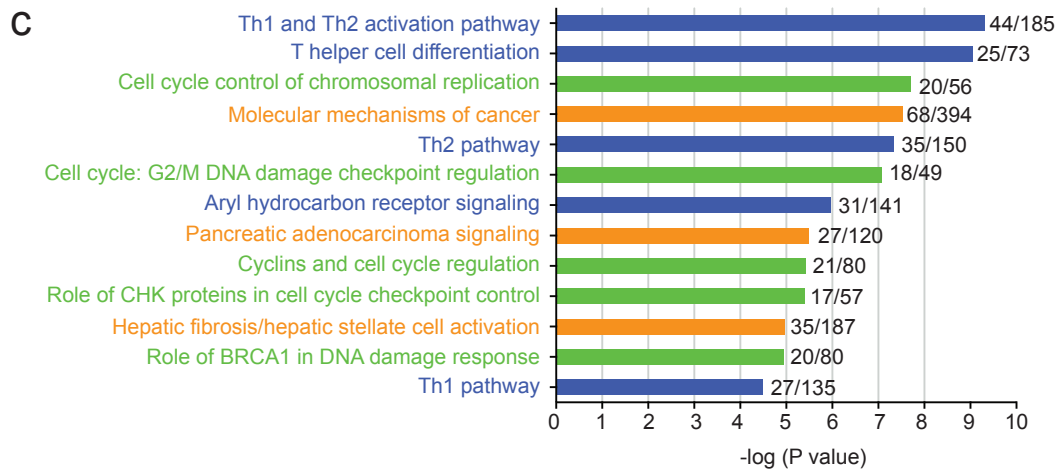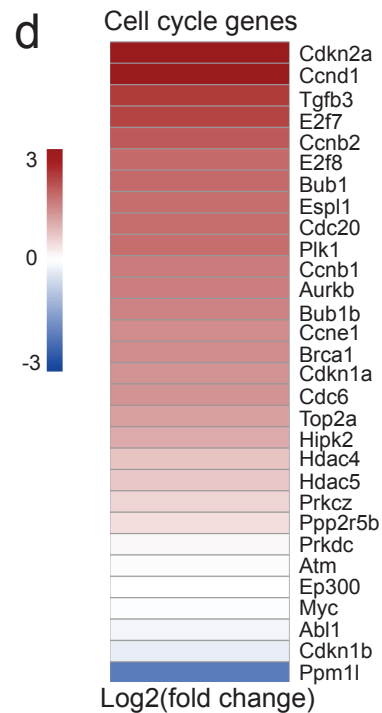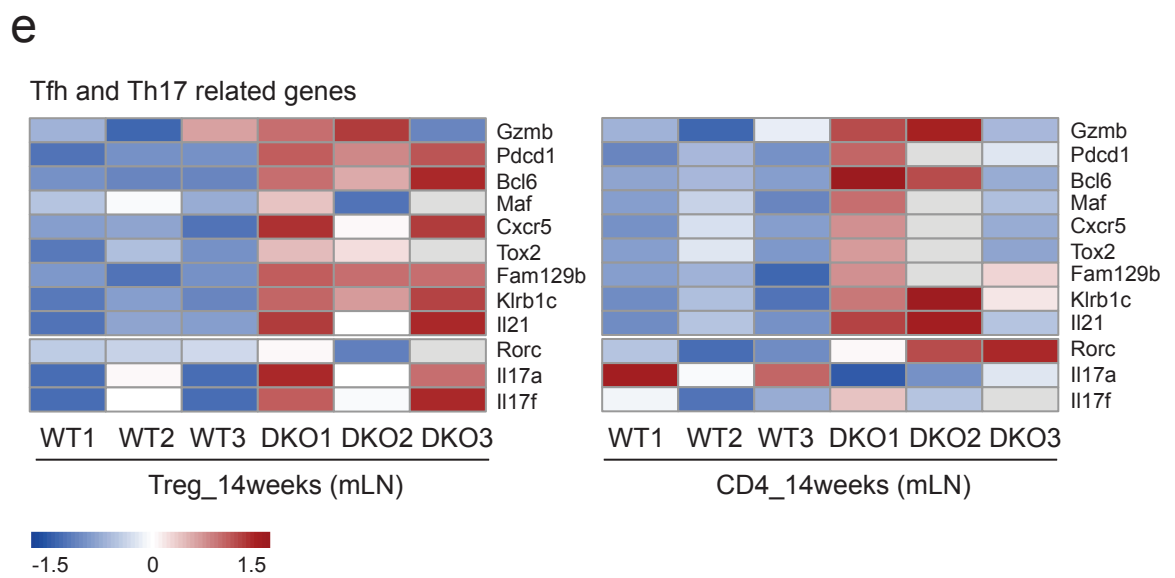

**Supplementary Figure 8. RNA-seq analysis for Treg cells isolated from mLN of WT or *Tet2/3<sup>fl/fl</sup>Foxp3<sup>Cre</sup>* DKO mice.**

**a.** Mean average (MA) plot of genes differentially expressed in *Tet2/3* DKO Tregs (14-weeks old, isolated from mLN) relative to their expression in WT Treg cells. **b.** Overlap of differentially expressed genes that are upregulated (upper panel) or downregulated (lower panel) in *Tet2/3* DKO Treg cells isolated from either pooled spleen and pLNs or from mLN. **c.** IPA analysis of canonical pathways for differentially expressed genes in *Tet2/3* DKO Treg cells isolated from mLN. Green, categories related to DNA repair, DNA damage and cell cycle; blue, categories related to immune cell function; orange, category related to cancer. **d.** Heatmap for the expression of selected genes encoding cell cycle regulators. The color gradient indicates Log<sub>2</sub> Fold Change (DKO/WT). **e.** Heatmaps showing expression (row z score of log<sub>2</sub> TPM values) of Tfh and Th17 related genes in WT and DKO Tregs (*left panel*) and WT and DKO CD4<sup>+</sup>Foxp3<sup>-</sup> cells (*right panel*).

## Supplementary Figure 9

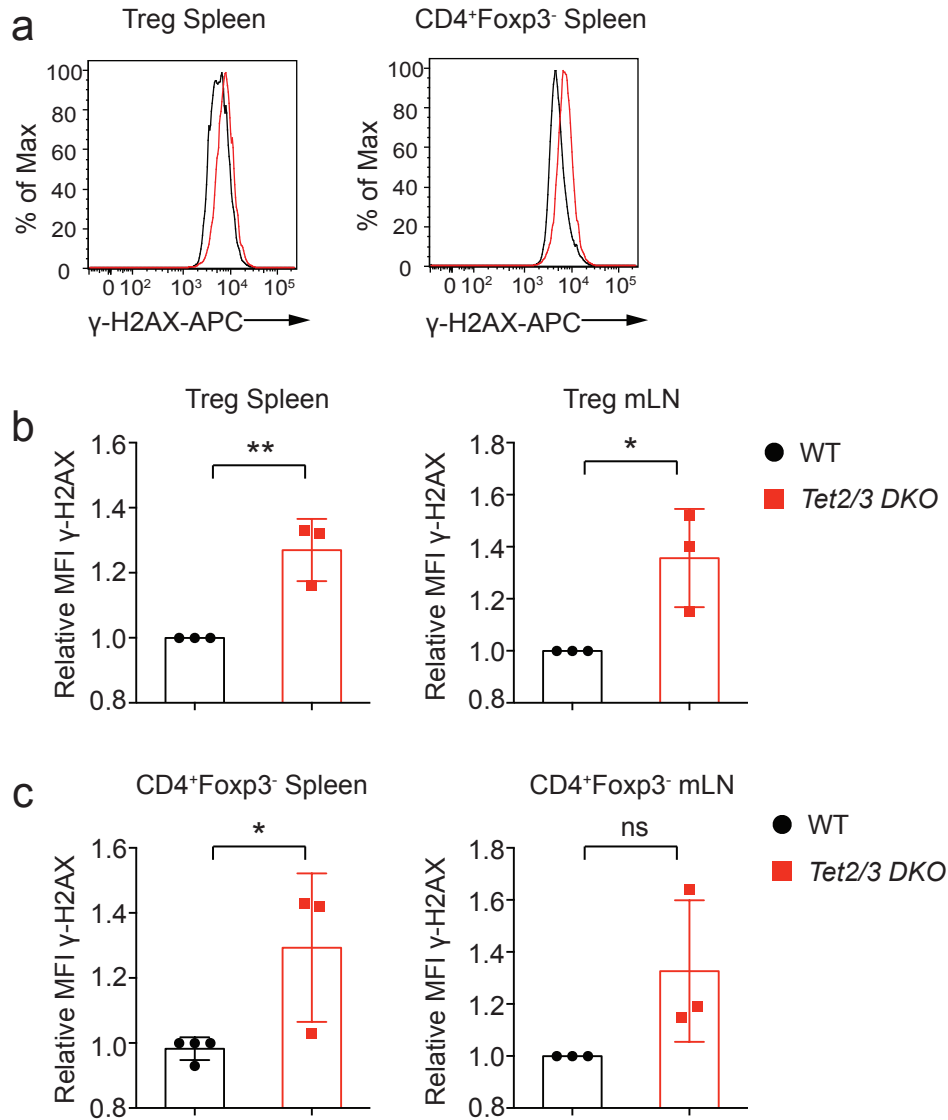

### Supplementary Figure 9. *Tet2/3* DKO cells show increased level of DNA damage.

**a.** Representative flow cytometry analysis of  $\gamma$ -H2AX in Treg cells (*left panel*) and CD4<sup>+</sup>Foxp3<sup>-</sup> T cells (*right panel*) in spleen isolated from WT and *Tet2/3<sup>fl/fl</sup>Foxp3<sup>Cre</sup>* DKO mice (13-16 weeks old) **b.** Relative MFI (mean fluorescent intensity) of  $\gamma$ -H2AX in Treg cells from WT and *Tet2/3<sup>fl/fl</sup>Foxp3<sup>Cre</sup>* DKO mice (13-16 weeks old) in Spleen (*left panel*) and mLN (*right panel*). **c.** Relative MFI of  $\gamma$ -H2AX in CD4<sup>+</sup>Foxp3<sup>-</sup> cells from WT and *Tet2/3<sup>fl/fl</sup>Foxp3<sup>Cre</sup>* DKO mice (13-16 weeks old) in Spleen (*left panel*) and mLN (*right panel*). Error bars show mean  $\pm$  s.d. from three independent experiments. Statistical analysis was performed using two-tailed unpaired student's t test (\*P<0.05, \*\*P<0.01, ns: not significant).

## Supplementary Figure 10

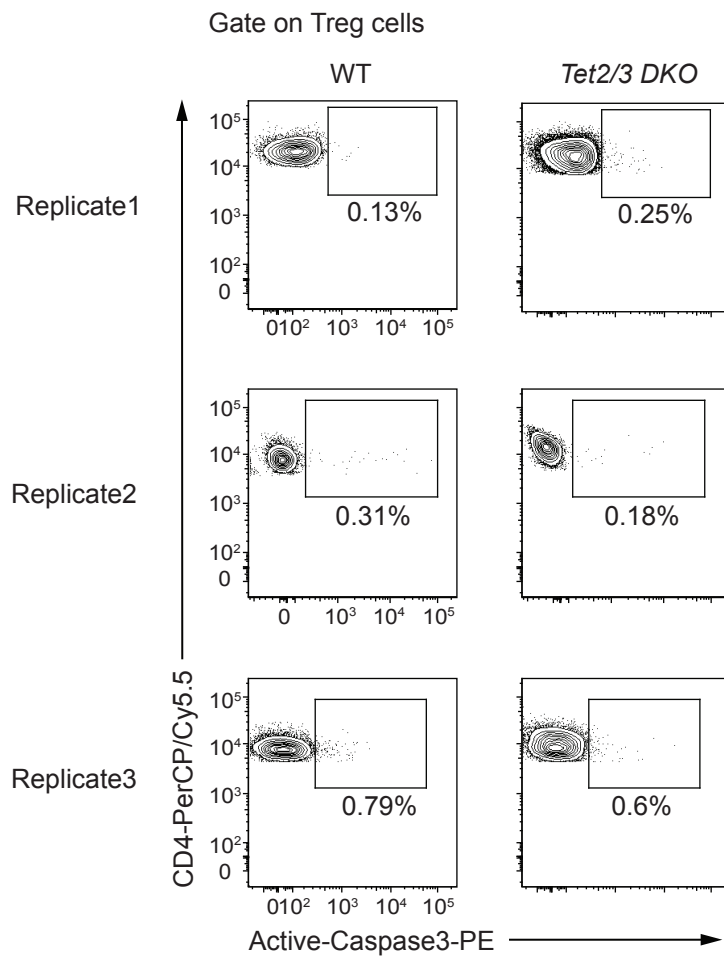

### Supplementary Figure 10. Caspase 3 staining to evaluate the apoptosis in *Tet2/3* DKO Treg cells.

Flow cytometry staining of active caspase-3 in WT and *Tet2/3* DKO Treg cells using PE-conjugated anti-active Caspase-3 antibody. Data are from three independent experiments.

## Supplementary Figure 11

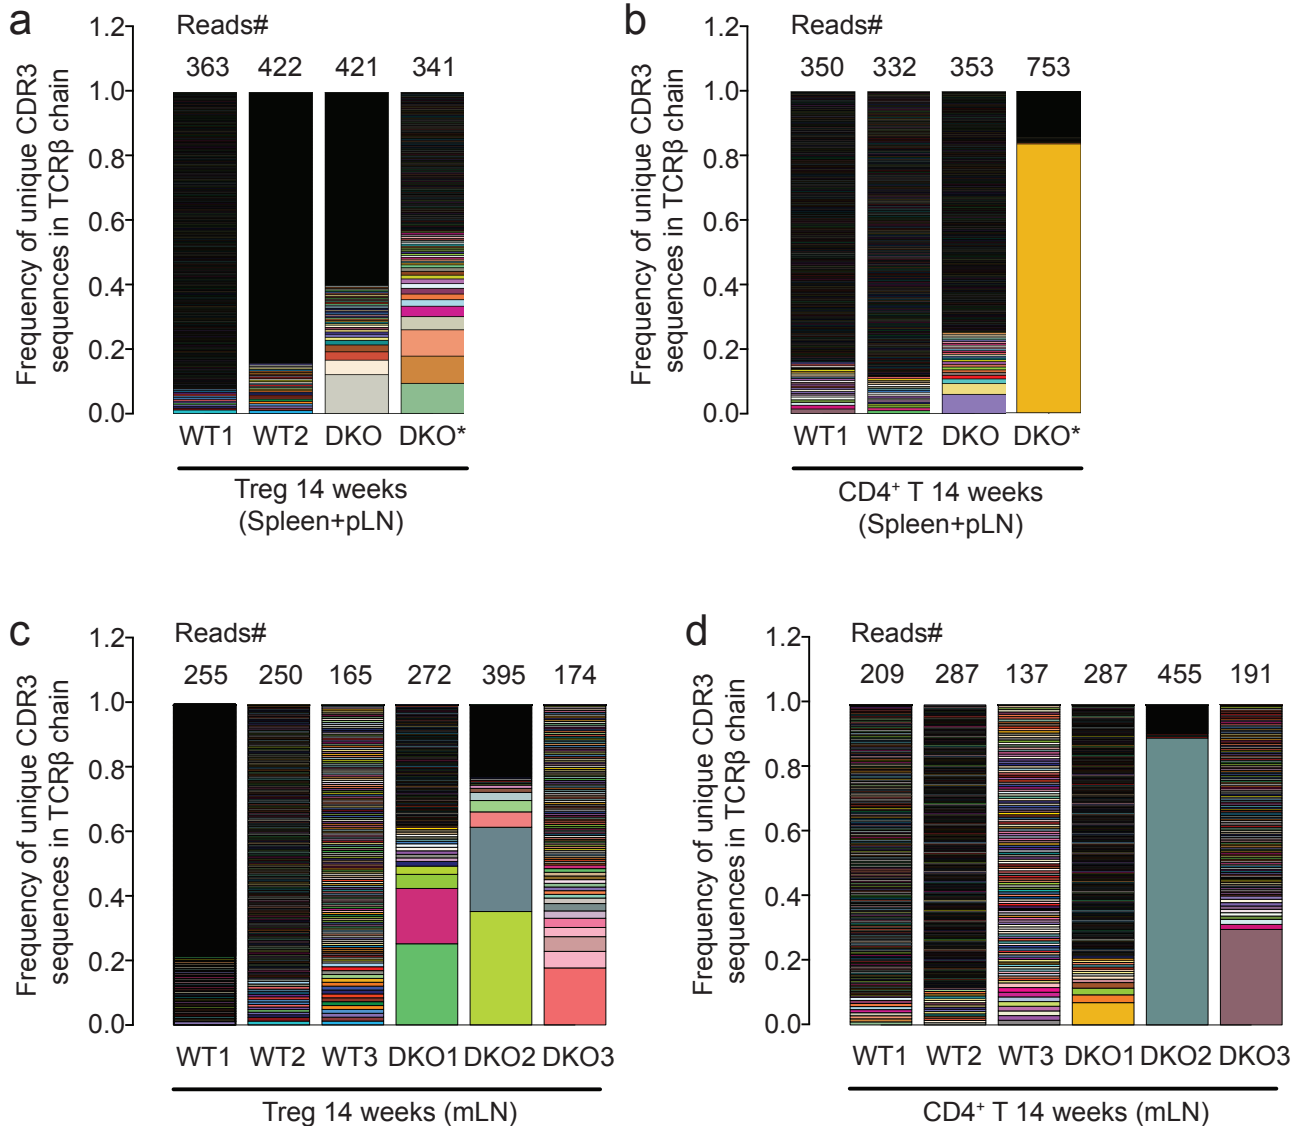

### Supplementary Figure 11. *Tet2/3* DKO cells show increased T cell clonal expansion.

**a-b.** The frequency of reads (from the RNA-seq data of pooled spleen and pLNs) mapping to unique CDR3 sequences in TCRβ chain in WT and DKO Tregs from 14-week-old WT and *Tet2/3<sup>fl/fl</sup>Foxp3<sup>Cre</sup>* DKO mice (**a**), in WT and DKO CD4<sup>+</sup>Foxp3<sup>-</sup> T cells from 14-week-old WT and *Tet2/3<sup>fl/fl</sup>Foxp3<sup>Cre</sup>* DKO mice (**b**). **c-d.** The frequency of reads (from the RNA-seq data of mLN) mapping to unique CDR3 sequences in TCRβ chain in WT and DKO Tregs from 14-week-old WT and *Tet2/3<sup>fl/fl</sup>Foxp3<sup>Cre</sup>* DKO mice (**c**), in WT and DKO CD4<sup>+</sup>Foxp3<sup>-</sup> T cells from 14-week-old WT and *Tet2/3<sup>fl/fl</sup>Foxp3<sup>Cre</sup>* DKO mice (**d**). Each color represents a different TCRβ CDR3 sequence; the number of reads is shown on top of each graph.

# Supplementary Figure 12

**a** 14-16 weeks after transfer

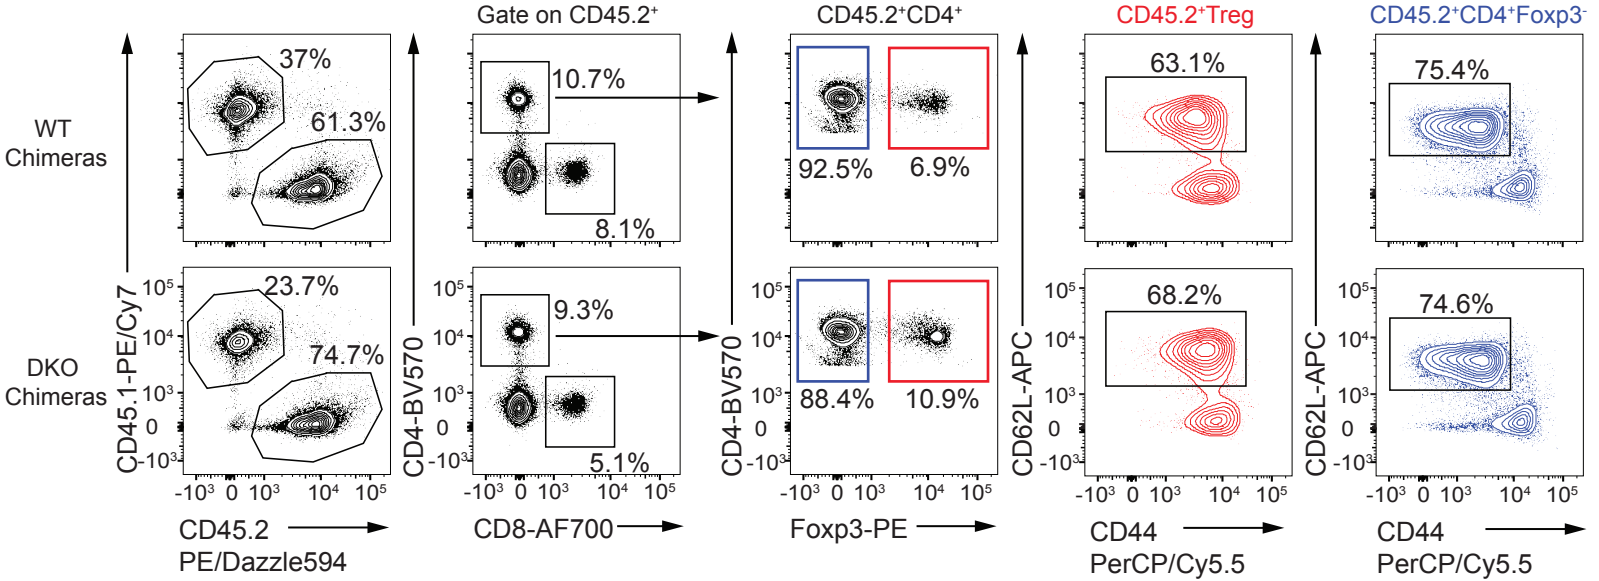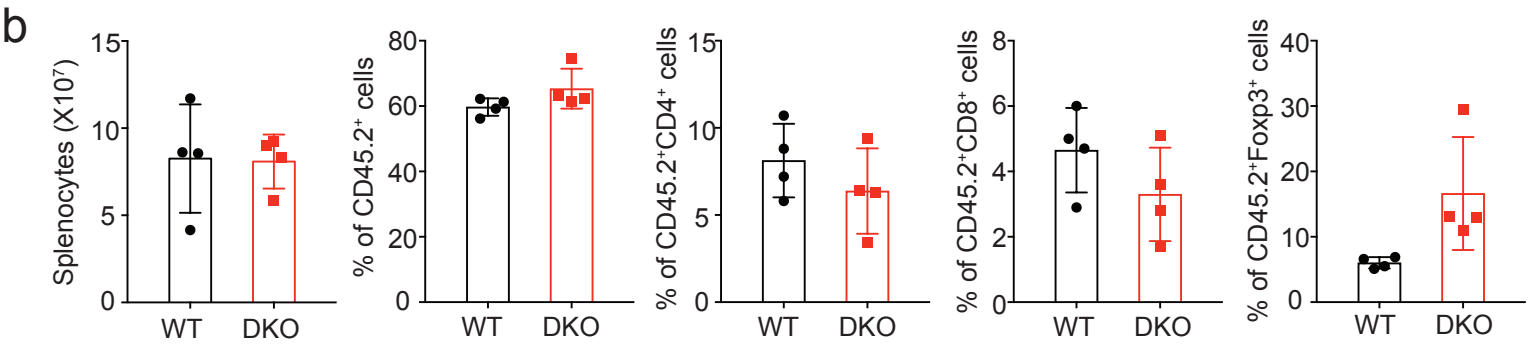

**Supplementary Figure 12. Analyses of bone marrow chimeras at earlier time points, prior to splenomegaly.**

**a.** Representative flow cytometry analysis for WT and DKO mixed bone marrow chimeras 14-16 weeks after transfer, before the development of splenomegaly. **b.** From left to right, the graphs show quantifications for the total number of splenocytes, the percentage of CD45.2<sup>+</sup> cells, the percentage of CD4<sup>+</sup> and CD8<sup>+</sup> cells within the CD45.2<sup>+</sup> cells and the percentage of Foxp3<sup>+</sup> cells within the CD45.2<sup>+</sup>CD4<sup>+</sup> cells (n=4). Error bars show mean ± s.d. from three independent experiments.



## Supplementary Figure 13

CD4<sup>+</sup>YFP<sup>-</sup> Cells

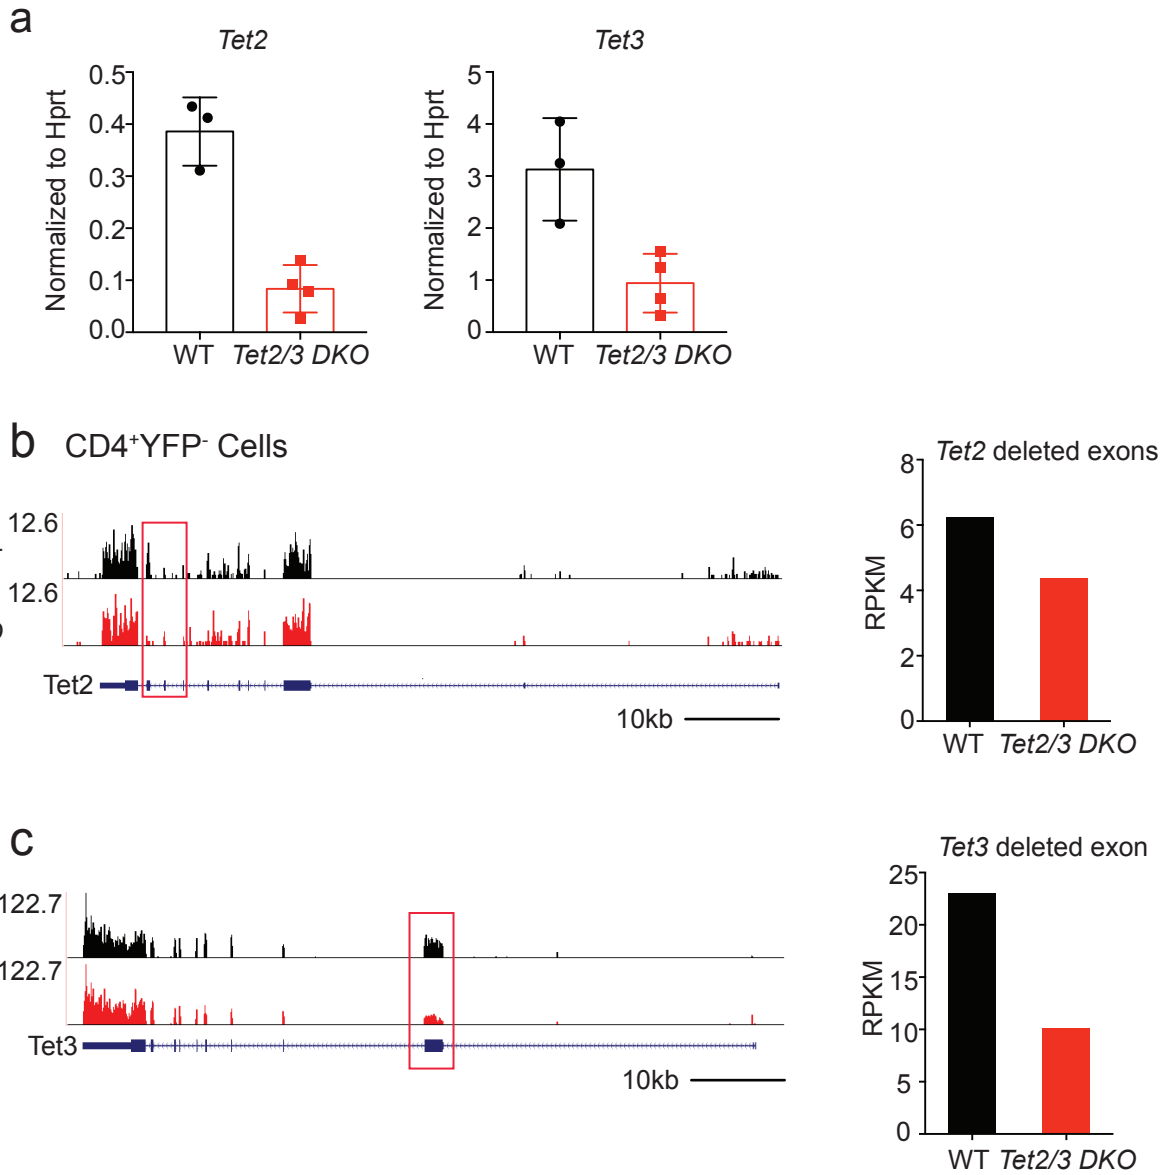

**Supplementary Figure 13. Analyses of *Tet2* and *Tet3* expression at mRNA level in CD4<sup>+</sup>YFP<sup>-</sup> T cells from *Tet2/3<sup>fl/fl</sup>Foxp3<sup>Cre</sup>* DKO mice.**

**a.** Quantitative real-time PCR analysis of *Tet2* and *Tet3* expression in CD4<sup>+</sup>YFP<sup>-</sup> cells from WT and *Tet2/3<sup>fl/fl</sup>Foxp3<sup>Cre</sup>* DKO mice (13-16 weeks old). Error bars show mean  $\pm$  s.d. from three independent experiments.  
**b-c.** Genome browser tracks of *Tet2* and *Tet3* with the deleted exons highlighted in rectangles (*left panels*) and the number of normalized reads within the deleted exons (*right panels*).

**Supplementary Table1. Hematological parameters in *Tet2/3* DKO mice**

|                            | WT            | DKO        | P value   |
|----------------------------|---------------|------------|-----------|
| WBC ( $10^3/\mu\text{l}$ ) | 9.66±1.62     | 8.66±0.95  | 0.3298    |
| Neutrophil (103/ul)        | 1.91±0.30     | 2.98±0.84  | 0.0525    |
| Lymphocyte (103/ul)        | 7.47±1.30     | 5.29±1.04  | *, 0.0401 |
| Monocyte (103/ul)          | 0.20±0.06     | 0.26±0.06  | 0.2248    |
| Eosinophil (103/ul)        | 0.07±0.02     | 0.10±0.05  | 0.2508    |
| Basophil (103/ul)          | 0.02±0.01     | 0.03±0.01  | 0.3202    |
|                            |               |            |           |
| RBC (106/ul)               | 9.75±0.25     | 9.48±0.33  | 0.2332    |
| Hemoglobin (g/dL)          | 12.93±0.26    | 12.48±0.81 | 0.3291    |
| Hematocrit (%)             | 46.05±0.91    | 44.50±1.82 | 0.1783    |
|                            |               |            |           |
| Platelet (103/ul)          | 1043.75±85.18 | 782±214.82 | 0.0641    |

**Supplementary Table 2. Pearson Correlations between replicates for mLN RNA-seq**

|          | Treg WT1 | Treg WT2 | Treg WT3 |
|----------|----------|----------|----------|
| Treg WT1 | 1        |          |          |
| Treg WT2 | 0.942    | 1        |          |
| Treg WT3 | 0.942    | 0.943    | 1        |

|         | CD4 WT1 | CD4 WT2 | CD4 WT3 |
|---------|---------|---------|---------|
| CD4 WT1 | 1       |         |         |
| CD4 WT2 | 0.943   | 1       |         |
| CD4 WT3 | 0.942   | 0.943   | 1       |

|           | Treg DKO1 | Treg DKO2 | Treg DKO3 |
|-----------|-----------|-----------|-----------|
| Treg DKO1 | 1         |           |           |
| Treg DKO2 | 0.918     | 1         |           |
| Treg DKO3 | 0.922     | 0.917     | 1         |

|          | CD4 DKO1 | CD4 DKO2 | CD4 DKO3 |
|----------|----------|----------|----------|
| CD4 DKO1 | 1        |          |          |
| CD4 DKO2 | 0.913    | 1        |          |
| CD4 DKO3 | 0.926    | 0.918    | 1        |
