# Supplementary material for: Loss of TET2 and TET3 in regulatory T cells unleashes effector function
Source: PubMed Central journal article supplement (PMC6494907; doi:10.1038/s41467-019-09541-y), 2019-05-01
Supplement: 41467_2019_9541_MOESM3_ESM.pdf [file 41467_2019_9541_MOESM3_ESM.pdf]

## Description of Additional Supplementary Files

File Name: Supplementary Data 1

Description: Altered Treg signature genes in 14 week-old Tet2/3 DKO Tregs

File Name: Supplementary Data 2

Description: Differentially expressed genes involved in different pathways (pooled spleen and pLNs)

File Name: Supplementary Data 3

Description: Differentially expressed genes involved in different pathways (mLNs)

File Name: Supplementary Data 4

Description: CDR3 sequences for Treg cells and CD4+ T cells from periphery

File Name: Supplementary Data 5

Description: CDR3 sequences for Treg cells and CD4+ T cells from mLNs
